1 **Prevalence and factors associated with fear of COVID-19 in military personnel during the**  
2 **second epidemic wave in Peru**

3 Danai Valladares-Garrido<sup>1,2</sup>, Helena Dominguez-Troncos<sup>3,4</sup>, Cinthia Karina Picón-Reátegui<sup>5</sup>,  
4 Christopher Valdiviezo-Morales<sup>3,4</sup>, Víctor J. Vera-Ponce<sup>6,7</sup>, Virgilio E. Failoc-Rojas<sup>8,\*</sup>, César  
5 Johan Pereira-Victorio<sup>9,\*</sup>, Darwin A. León-Figueroa<sup>5</sup>, Mario J. Valladares-Garrido<sup>10,11</sup>

6 <sup>1</sup>Facultad de Medicina, Universidad Cesar Vallejo, Trujillo 22700, Peru;

7 [danai.paola@gmail.com](mailto:danai.paola@gmail.com) (D.V.-G.)

8 <sup>2</sup>Unidad de Epidemiología y Salud Ambiental, Hospital de Apoyo II Santa Rosa, Piura 20008,

9 Peru

10 <sup>3</sup> School of Medicine, Universidad Nacional de Piura, Piura, Peru;

11 [0902018007@alumnos.unp.edu.pe](mailto:0902018007@alumnos.unp.edu.pe) (H.D.T.); [0902017001@alumnos.unp.edu.pe](mailto:0902017001@alumnos.unp.edu.pe) (C.V.M.)

12 <sup>4</sup> Scientific Society of Medical Students from Universidad Nacional de Piura, Piura, Peru

13 <sup>5</sup> Facultad de Medicina Humana, Universidad de San Martín de Porres, Chiclayo 15011, Peru,

14 [cinthia\\_picon@usmp.pe](mailto:cinthia_picon@usmp.pe) (C.K. P.R.); [darwin\\_leon@usmp.pe](mailto:darwin_leon@usmp.pe) (D.A.L.F.)

15 <sup>6</sup> Instituto de Investigación en Ciencias Biomédicas, Universidad Ricardo Palma, Lima 15039,

16 Peru; [victor.vera@urp.edu.pe](mailto:victor.vera@urp.edu.pe) (V.J.V.P.)

17 <sup>7</sup> Universidad Tecnológica del Perú, Lima 15046, Peru

18 <sup>8</sup> Research Unit for Generation and Synthesis Evidence in Health, Universidad San Ignacio de

19 Loyola, Lima 15024, Peru; [vfailoc@usil.edu.pe](mailto:vfailoc@usil.edu.pe) (V.E.F.R)

20 <sup>9</sup> School of Medicine, Universidad Continental, Lima 15046, Peru; [cpereirav@continental.edu.pe](mailto:cpereirav@continental.edu.pe)

21 (C.J.P.V.)

22 <sup>10</sup> South American Center for Education and Research in Public Health, Universidad Norbert

23 Wiener, Lima 15046, Peru; [mario.valladares@uwiener.edu.pe](mailto:mario.valladares@uwiener.edu.pe) (M.J.V.G.)

24 <sup>11</sup>Oficina de Epidemiología, Hospital Regional Lambayeque, Chiclayo 14012, Peru

25 \*Correspondence: Virgilio E. Failoc-Rojas ([vfailoc@usil.edu.pe](mailto:vfailoc@usil.edu.pe)); César Johan Pereira-Victorio  
26 ([cpereirav@continental.edu.pe](mailto:cpereirav@continental.edu.pe))

27

## 28 **Abstract**

29 There is few research in military members that provided protection and security during  
30 the COVID-19 crisis. We aimed to determine the prevalence and factors associated with  
31 fear of COVID-19 in military members. A cross-sectional study was conducted between  
32 November 02 and 09, 2021, during the second wave of the COVID-19 pandemic in the  
33 region of Lambayeque, Peru. The outcome was fear of COVID-19, measured with the Fear  
34 of COVID-19 Scale. The association with resilience (abbreviated CD-RISC), food  
35 insecurity (HFIAS), physical activity (IPAQ-S), eating disorder (EAT-26), and other socio-  
36 labor variables were assessed. Of 525 participants, the median age was 22, 95.8% were  
37 male, and 19.2% experienced fear of COVID-19. A higher prevalence of fear of COVID-  
38 19 was associated with age (PR=1.03; 95% CI: 1.01-1.06), religion (PP=2.05; 95% CI: 1.04-  
39 4.05), eating disorder (PR=2.95; 95% CI: 1.99-4.36), and having a relative with mental  
40 disorder (PR=2.13; 95% CI: 1.09-4.17). Overweight (PR=0.58; 95% IC: 0.37-0.90) and a high  
41 level of resilience (PR=0.63; 95% IC: 0.43-0.93) were associated with a lower prevalence of  
42 fear of COVID-19. Two out of ten military personnel were afraid of COVID-19. We

43 recommend special attention to the factors associated with the development of suicide  
44 risk in military personnel.

45 **Keywords:** COVID-19; fear; military; Peru

46

## 47 **Introduction**

48 Since its outbreak, COVID-19 has represented a threat to physical (1–4) and psychological  
49 health (5–14), which, together with its impact on the social and economic level, has had  
50 repercussions on the safety and well-being of the population (15,16). The severity (2,17)  
51 and high transmission rate of COVID-19 (18,19) has created fear in people (15,20), who,  
52 by being misinformed, have suffered the psychological impact due to the concern of  
53 becoming infected and infecting their loved ones (20,21). A total of 30.5-41.8% of fear of  
54 COVID-19 in various populations has been estimated (22,23), even a study conducted in  
55 Peruvian policemen found that 42.5% were afraid of COVID-19 (24). In Latin America, an  
56 average percentage of 15.54 on the scale of fear of COVID-19 has been described (25),  
57 which is among the lowest, compared to other continents (21.7-23.8) (23).

58 Fear of COVID-19 has been studied in healthcare personnel (26). However, little research  
59 has been conducted in military personnel, who have also played an important role in the  
60 fight against COVID-19 (5,27). This population has been responsible for providing  
61 protection and security to citizens, through the installation of temporary hospitals. They  
62 have ensured compliance with preventive measures and helped with the transfer of

63 patients or corpses (28). Hence, they could be exposed to trauma and put their  
64 psychological and physical health at risk, similar to health care personnel (29). A study  
65 conducted in the Spanish Armed Forces found that 52.6% felt that they would need  
66 psychological help in the face of a new wave of the pandemic and 49.2% felt fear of death  
67 (28). Studies in the general population have found factors associated with fear of COVID-  
68 19 such as age (30), being a female (31), resilience, having chronic diseases (31,32), anxiety  
69 (33), absence of alcoholism (31), non-smoking (31), perception of getting infected with  
70 COVID-19, and fear of risk for loved ones (33). However, the instrument used to measure  
71 fear of COVID-19 was not validated (30), nor did the authors investigate other variables  
72 of interest such as religious aspects, eating disorders or family history of mental health,  
73 which we have evaluated in a military population.

74 Our research aims to expand the scientific evidence on fear of COVID-19 in military  
75 personnel to know the psychological impact that the pandemic has caused in this  
76 population and to allow the future implementation of psychological interventions to cope  
77 with this fear. Therefore, this study aims to determine the prevalence and factors  
78 associated with fear of COVID-19 in Peruvian military personnel during the second  
79 pandemic wave.

80

81

82

## 83 **Materials and Methods**

### 84 *Study design and population*

85 This study is analytical and cross-sectional. We used a secondary data analysis to identify  
86 the prevalence and the factors associated with fear of COVID-19 in military personnel in  
87 Lambayeque, Peru.

88 The population of the study is comprised of military personnel in charge of the first line  
89 of defense of the health emergency due to COVID-19 in the city of Lambayeque, Peru.

90 The sample was made up of 525 military personnel. In the primary study, the military  
91 personnel that were included were those who were working for one month, at least, at  
92 the moment of the administration of the survey. In the secondary study, those who did  
93 not respond the Fear of COVID-19 Scale questions completely were excluded. This scale  
94 measured the outcome variable of this research. The sampling was non-probability,  
95 snowball-type.

### 96 *Procedure*

97 Authorization was requested from the infantry brigade of Lambayeque to conduct the  
98 interviews with military personnel. Data collection forms were created using the REDCap  
99 system to obtain optimal data quality control and generate an online questionnaire link.  
100 The interviews were conducted in person, under strict compliance with biosecurity  
101 measures (mandatory use of masks, continuous hand sanitization, and use of open spaces  
102 to promote ventilation). Data collection was carried out from November 2 to 9, 2021, and

103 was organized in two shifts (morning and afternoon) under the supervision of a military  
104 member of the institution. The questionnaire link was shared with the supervising  
105 military officer, who distributed it to the entire study population via text message,  
106 WhatsApp virtual message and internal coordination groups. Before starting to fill out  
107 the questionnaires, the sample members were asked for their informed consent  
108 electronically to participate in the study.

### 109 *Variable and instruments*

110 **Fear of COVID (Fear of COVID Scale):** the outcome variable was fear of COVID-19,  
111 operationally defined as a score higher than 16.5 in the summation of the responses  
112 obtained from the Fear of COVID-19 Scale (34). This scale consists of seven items and is  
113 reliable and valid for assessing fear of COVID-19 among the general population, with a  
114 Cronbach's alpha of 0.82 (35). An investigation of the psychometric properties of the  
115 Spanish version of the Fear of COVID-19 Scale in a sample of the Peruvian population  
116 showed that this brief scale of fear of COVID-19 has adequate measurement properties  
117 both in terms of reliability and validity (36).

118 The exposure variables were the following:

119 **Food Insecurity (HFIAS):** It was obtained through the Household Food Insecurity Access  
120 Scale. It is composed of nine questions that assesses food access of the last four weeks. It  
121 has adequate internal consistency (Cronbach's alpha of 0.74) (37). Also, this scale has the  
122 following categories: food security, mild, moderate and severe food insecurity (38).

123 **Physical activity (IPAQ-S):** It was obtained through the International Physical Activity  
124 Questionnaire IPAQ-S (short version). This instrument is composed of seven questions  
125 that evaluate physical activity in the last week. It is divided into low, moderate and high  
126 physical activity, after a weighted estimate of total physical activity reported in the last  
127 week (39). It shows adequate psychometric properties in Latin American population (39–  
128 41). In its abbreviated version, adequate correlations (0.26-0.69) in Spanish-speaking  
129 population have been estimated (42).

130 **Eating disorder (EAT-26):** It was obtained with the EAT-26, Eating Attitudes Test, after  
131 categorizing the score obtained about the absence or presence of such disorder, using a  
132 cut-off point of 20 points. This instrument is made up of 26 items measured with a Likert  
133 scale (never, rarely, sometimes, often, very often and always). It has been validated in  
134 male population from Colombia (Cronbach's alpha 0.98, sensitivity: 100%, specificity:  
135 97.8%) (43)

136 **Resilience (abbreviated CD-RISC):** It is operationally defined as a score above 30 points  
137 obtained from the answers of the Connor-Davidson questionnaire in the abbreviated  
138 version (44). This questionnaire is composed of ten questions and has excellent  
139 psychometric properties (Cronbach's alpha of 0.89) in the general population (45).

140 **Socio-occupational variables:** Among them, we can mention age in years, gender  
141 (female, male), marital status (single, married, cohabiting, divorced), religion (none,  
142 Catholic, non-Catholic), having children (no, yes), frequent consumption of alcohol (no,

143 yes) and tobacco (no, yes), body mass index (underweight, normal, overweight, obese),  
144 previous history of mental health (no, yes), previous family history of mental health (no,  
145 yes), report of having sought mental health support (no, yes), confidence in the  
146 government to handle the pandemic (no, yes), and how long the sample was working  
147 during the COVID-19 health emergency (one to six months, seven to twelve months,  
148 thirteen to eighteen months, nineteen months, or more).

#### 149 *Statistical analysis*

150 The statistical analysis was performed in Stata 17.

151 In the descriptive analysis, frequencies and percentages were estimated for the  
152 categorical variables. For age as a numerical variable, the median and interquartile range  
153 was reported, given that it had a non-normal distribution.

154 In the hypothesis testing analysis, we assessed whether the categorical independent  
155 variables were associated with the outcome variable (fear of COVID) using the Chi-  
156 squared test. In the case of age, we used the Mann-Whitney U test after the evaluation of  
157 the assumption of normal distribution.

158 We built simple and multiple regression models to investigate the factors associated with  
159 fear of COVID. Prevalence ratios (PR) and 95% confidence intervals (95% CI) were  
160 estimated. We used the generalized linear models, family Poisson distribution and log-  
161 link function with robust variance.

#### 162 *Ethical aspects*



163 The primary study was approved by the Ethics Committee of Universidad San Martín de  
164 Porres (USMP) with the code 269-2022-CIEI-FMH-USMP. The privacy of the respondents  
165 was strictly respected, and the data collected was kept anonymous. In addition, informed  
166 consent was obtained electronically from participants of legal age who were military  
167 personnel.

## 168 **Results**

169 Regarding the 525 military personnel selected for this analysis, we found that the median  
170 age was 22, 95.8% were male, 17.1% consumed alcohol frequently, and 8.2% reported  
171 having sought mental health support due the COVID-19 pandemic. Almost half of them  
172 had food insecurity (49.5%) and 43.6% had a high level of resilience. Also, 19.2% felt fear  
173 of COVID-19. **Table 1.**

174 **Table 1.** Characteristics of military personnel from Lambayeque, Peru (n=525).

175 A total of 10.7% and 10.1% mentioned having felt fear of losing their lives due to  
176 coronavirus and having felt uncomfortable thinking about coronavirus, respectively. In  
177 addition, 9.1% reported having felt much fear of COVID-19. **Fig 1.**

178 **Fig 1.** Fear of COVID-19 Scale.

179 We found that the participants with a low level of resilience had a higher level of  
180 prevalence of fear of COVID, in comparison with those who had a high level of resilience  
181 (23% vs. 14%;  $p=0.007$ ). Moreover, military personnel with eating disorders showed a  
182 higher prevalence of fear of COVID, in comparison with those who did not have that

183 disorder (44.4% VS. 16.4%;  $p < 0.001$ ). Furthermore, age in years, religion, frequent  
184 consumption of alcohol and tobacco, having a relative with mental illnesses, and how  
185 long they have been working were associated with fear of COVID-19. **Table 2.**

186 **Table 2.** Factors associated with fear of COVID-19 in military personnel, bivariate  
187 analysis.

188 In the multiple regression model, we found that the factors associated with a high level  
189 of prevalence of fear of COVID-19 were age (in years) (PR=1.03; 95% IC: 1.01-1.06), having  
190 a religion (PP=2.05; 95% IC: 1.04-4.05), having a relative with a mental disorder (PR=2.13;  
191 95% IC: 1.09-4.17) and having an eating disorder (PR=2.95; 95% CI: 1.99-4.36). In contrast,  
192 being overweight and having a high level of resilience reduces the prevalence of fear of  
193 COVID-19 in military personnel by 42% (PR=0.58; 95% IC: 0.37-0.90) and 37% (PR=0.63;  
194 95% IC: 0.43-0.93). (**Table 3** and **Fig 2**).

195 **S3 Table.** Table 3. Factors associated with fear of COVID-19 in military personnel, simple  
196 and multiple regression analysis.

197 **Fig 2.** Forest plot of the factors associated with fear of COVID-19 in military personnel.

198

## 199 **Discussion**

### 200 *Main findings*

201 It was found that two out of ten participants were afraid of COVID-19. Factors associated  
202 with a higher prevalence of fear of COVID-19 were older age, being religious, having a

203 family member with a history of mental illness, and having an eating disorder. Factors  
204 associated with a lower prevalence of fear of COVID-19 were being overweight and  
205 having a high level of resilience.

### 206 *Prevalence of fear of COVID-19*

207 We found that almost two out of ten participants (19.2%) were afraid of COVID-19. This  
208 differs from what was found in our country by Caycho et al., who reported twice the  
209 incidence of fear of COVID-19 (42.5%), and 43% of the sample reported being very afraid  
210 of losing their lives to COVID-19 (46). On the other hand, in Spain, Lázaro-Perez et al.  
211 found a four times higher incidence (80%) of fear of their own or others' death due to  
212 COVID-19 (47). The relatively low incidence of fear of COVID-19 in our study could be  
213 explained by the timing of the execution of the investigations. This is, Caycho et al.  
214 conducted their study in 2020, a time in which our country reached the maximum peaks  
215 of infected and deaths due to COVID-19; therefore, the armed and police forces played a  
216 very important role in the enforcement of security measures dictated by the Peruvian  
217 state (46). Similarly, Lázaro-Pérez et al. carried out their research at the beginning of the  
218 second wave (August-September 2020), which, together with the discovery of new  
219 variants of SARS-CoV-2 and the announcement of a new confinement, caused great  
220 consternation in the Spanish population (47).

### 221 *Resilience and fear of COVID-19*

222 Participants with a high level of resilience had a 47% lower prevalence of fear of COVID-  
223 19. This finding coincides with what was reported by Satici et. al, who found that during  
224 the first months of the pandemic people with resilience felt less fear of COVID-19 because  
225 of a mechanism involving subjective hope and happiness in the face of adversity (48).  
226 Although we did not find a similar study that associated these variables in the population  
227 studied in the context of the COVID-19 pandemic, there is literature that supports  
228 resilience as a protective factor against mental health problems, in addition to being  
229 associated with better military performance (49,50). In addition, there is evidence  
230 suggesting that individuals with more resilience tend to externalize less fear and anxiety,  
231 which may be explained by the military training that rewards resistance, self-sufficiency  
232 and privacy, stigmatizing both physical and emotional weakness (51).

### 233 *Factors associated with fear of COVID-19*

234 In our research, we found that the older the age, the higher the prevalence of fear of  
235 COVID-19. This is similar to what was reported in the United States by Niño et. al, who  
236 conducted a study in 10,368 American citizens. These authors identified that the older the  
237 age, the greater the perception of threat and, hence, the greater the fear of COVID-19 (52).  
238 This finding could be explained by the fact that these individuals are part of the  
239 population at risk of experiencing a more serious and complicated disease, with higher  
240 mortality rates (53–55). However, this finding differs from what was found by Soraci et  
241 al. in Italian population and Mistry SK et al. in Bangladesh, who did not find significant

242 differences between age and fear of COVID-19 (11,12). On the contrary, Andrade et al,  
243 in Brazil, reported that the older the age, the lower the fear of COVID-19. The authors  
244 stated that the older population tends to worry less about death, has less knowledge of  
245 the disease and is generally more reluctant to accept safety measures (58).

246 Participants who reported being religious had a 105% higher prevalence of fear of  
247 COVID-19. This differs from the findings of Prazeres et al., in Portugal, who found no  
248 association between religiosity and fear of COVID-19 (59). On the other hand, Ghoncheh  
249 K. et al., in Iran, found that those individuals with greater religiosity and spirituality  
250 reported less fear of COVID-19 because such individuals act according to a belief system  
251 that allows them to cope with difficulties of various kinds. That helps them to decrease  
252 their levels of psychological distress. The contradictory finding of our study could be  
253 explained by work overload of the military and police forces and social distancing, which  
254 impeded the meetings of these religious communities, which deprived them of the  
255 support they obtained from their activities (masses, spiritual retreats, etc.). This last  
256 phenomenon is supported by the study conducted in the United States by Gomez et al.,  
257 in which the emotional impact of the COVID-19 quarantine on people's religiosity is  
258 analyzed (60).

259 It was found that overweight participants reduced prevalence of fear of COVID-19 by  
260 42%. We did not find studies similar to ours; however, it differs from what was reported  
261 in China by Chen et al. as overweight participants showed higher levels of fear of COVID-

262 19 compared to those with a normal BMI (61). It is based on multiple studies that relate  
263 overweight and obesity with a higher morbidity and mortality of this disease (62–64).  
264 This peculiar finding could be explained by sociodemographic and cultural factors. This  
265 is, given that, in our country and in Latin America, being overweight could erroneously  
266 not be considered a health alteration, since it would provide strength and protection  
267 against adverse situations (65,66), as in the case of the COVID-19 pandemic.

268 Having a family member with a mental health history increases the prevalence of fear of  
269 COVID-19 by 113%. We have not found similar studies that relate the aforementioned  
270 variables. However, this finding could be explained by evidence that states that, due to  
271 the great physical and emotional pressure triggered by their work as caregivers. Hence,  
272 family members of people with mental illnesses have a lower quality of life and are  
273 predisposed to experience anxiety, depression, post-traumatic stress disorder, among  
274 other mental problems that could justify their fear in the context of the COVID-19  
275 pandemic (67–69).

276 Having an eating disorder is associated with a 195% increased prevalence of fear of  
277 COVID-19. This is similar to what was reported by Bemanian et al. in Norway and by  
278 Dos Santos et al. in Brazil, who found a strong association between psychological stress  
279 in the face of COVID-19 and social isolation with eating disorders such as emotional  
280 eating and binge eating disorder (70,71). This finding is supported by research linking  
281 such eating disorders as negative emotion management mechanisms through the release

282 of serotonin and dopamine resulting from inadequate carbohydrate and lipid intake  
283 (72,73). On the other hand, restrictive patterns could be explained by fear of COVID-19  
284 and concern about the quality of food and the possibility that it could be a mode of  
285 transmission (74). However, these findings differ from the studies of Ilktac et al. and Pak  
286 et al., who found a minimal association between the aforementioned variables, but when  
287 analyzed with other confounding variables in the multiple model, their effect was diluted  
288 (75,76).

### 289 *Implication of findings in mental health*

290 Considering the great impact of the COVID-19 pandemic on mental health in the general  
291 population, the findings reported in this study support the need for the implementation  
292 of strategies focused on populations vulnerable to COVID-19, such as military personnel.  
293 Measures to address this situation could be taken through the strengthening of the  
294 Community Mental Health Centers, which should engage and establish an ongoing  
295 assessment of this population in order to avoid adverse consequences on their mental  
296 health.

### 297 *Limitations and strengths*

298 This research has some limitations. First, its cross-sectional methodology does not allow  
299 us to attribute causality among the variables considered in the study. Second, the  
300 potential selection bias is another limitation, because the primary study included only  
301 one department, despite the fact that there is a large number of military personnel in the

302 rest of the country's departments. However, one of the strengths is that the probability  
303 sample obtained is ample and the instruments used have been validated in our country.  
304 In addition, variables previously not considered in similar studies such as religion, eating  
305 disorder and family history of mental problems have been considered.

## 306 **Conclusions**

307 Our findings evidence that two out of ten military personnel felt fear of COVID-19. We  
308 recommend that special attention should be paid to the factors associated with the  
309 development of suicide risk in military personnel. Among the most important, we can  
310 mention the following: age, religion, having a family member with a history of mental  
311 illness, and having an eating disorder. Despite the limitations of our study, the results  
312 may be useful for decision-making for the creation of mental health policies and  
313 interventions at all levels of care that consider this population group as a priority in the  
314 context of the COVID-19 health emergency.

315 **Ethics approval and consent to participate:** The primary study was approved by the  
316 Ethics Committee of Universidad San Martín de Porres (USMP) with the code 269-2022-  
317 CIEI-FMH-USMP.

318 **Consent for publication:** The authors agree to allow the publication of the information  
319 contained in the submitted article.

320 **Availability of data and materials:** The dataset generated and analyzed during the  
321 current study is not publicly available because the ethics committee has not provided



322 permission/authorization to publicly share the data, but it is available from the  
323 corresponding author upon reasonable request.

324 **Competing interests:** The authors have declared that no competing interests exist.

325 **Funding:** The authors received no specific funding for this work.

326 **Author Contributions:** Conceptualization, D.V.G., H.D.T., C.K.P.R., and M.J.V.G.;  
327 methodology, C.V.M., V.J.V.P., V.E.F.R., and C.J.P.V.; software, D.V.G., H.D.T., and  
328 M.J.V.G.; validation, D.V.G.; formal analysis, M.J.V.G. and D.A.L.F.; investigation,  
329 H.D.T., C.K.P.R., and M.J.V.G.; resources, D.V.G., D.A.L.F., and V.R.F.R.; data curation,  
330 M.J.V.G.; writing—original draft preparation, D.V.G., H.D.T., C.K.P.R., C.V.M., V.J.V.P.,  
331 V.E.F.R., D.A.L.F., C.J.P.V and M.J.V.G.; writing—review and editing, D.V.G., H.D.T.,  
332 C.K.P.R., C.V.M., V.J.V.P., V.E.F.R., D.A.L.F., C.J.P.V and M.J.V.G.; visualization, C.V.M.;  
333 supervision, M.J.V.G. All authors have read and agreed to the published version of the  
334 manuscript.

335 **Acknowledgements:** None.

336

### 337 **References**

- 338 1. Vasquez-Elera LE, Failoc-Rojas VE, Martinez-Rivera RN, Morocho-Alburqueque N,  
339 Temoche-Rivas MS, Valladares-Garrido MJ. Self-medication in hospitalized patients with  
340 COVID-19: A cross-sectional study in northern Peru. *Germs*. 2022;12(1):46-53. doi:  
341 10.18683/germs.2022.1305

- 342 2. León-Jiménez F, Vives-Kufof C, Failoc-Rojas VE, Valladares-Garrido MJ, León-Jiménez F,  
343 Vives-Kufof C, et al. Mortalidad en pacientes hospitalizados por COVID-19. Estudio  
344 prospectivo en el norte del Perú, 2020. *Revista médica de Chile*. 2021;149(10):1459-66. doi:  
345 10.4067/s0034-98872021001001459
- 346 3. Carhuapoma-Yance M, Apolaya-Segura M, Valladares-Garrido MJ, Failoc-Rojas VE, Díaz-  
347 Vélez C. Human development and Covid-19 lethality rate: Ecological study in America.  
348 *Revista del Cuerpo Medico Hospital Nacional Almanzor Aguinaga Asenjo*. 2021;14(3):362-  
349 6. doi: 10.35434/rmhnaaa.2021.143.1258
- 350 4. Zila-Velasque JP, Grados-Espinoza P, Quispe-Chura K, Valdiviezo-Morales CG, Diaz-Vélez  
351 C, Valladares-Garrido MJ. Prevalence and factors associated with food insecurity in eight  
352 high-altitude cities in Peru during the second wave of the COVID-19 pandemic: a  
353 retrospective, cross-sectional study. *BMC Public Health*. 2022;22(1):1962. doi:  
354 10.1186/s12889-022-14372-6
- 355 5. Guo X, Wu L, Yu X, Sun Z, Liu W. Mental Health Care for Military Personnel in the COVID-  
356 19 Epidemic. *Mil Med*. 2020;185(9-10):e1401-5. doi: 10.1093/milmed/usaa127
- 357 6. Fernandez-Canani MA, Burga-Cachay SC, Valladares-Garrido MJ. Association between  
358 Family Dysfunction and Post-Traumatic Stress Disorder in School Students during the Second  
359 COVID-19 Epidemic Wave in Peru. *International Journal of Environmental Research and  
360 Public Health*. 2022;19(15):9343. doi: 10.3390/ijerph19159343

- 361 7. Ponce VV, Garrido MV, Peralta CI, Astudillo D, Malca JT, Manrique EO, et al. Factores  
362 asociados al afrontamiento psicológico frente a la COVID-19 durante el periodo de cuarentena.  
363 Revista Cubana de Medicina Militar. 2020;49(4):0200870.
- 364 8. Valladares-Garrido MJ, Picón-Reátegui CK, Zila-Velasque JP, Grados-Espinoza P.  
365 Prevalence and Factors Associated with Insomnia in Military Personnel: A Retrospective  
366 Study during the Second COVID-19 Epidemic Wave in Peru. Healthcare. 2022;10(7):1199.  
367 doi: 10.3390/healthcare10071199
- 368 9. Agrawal S, Drózdź M, Makuch S, Pietraszek A, Sobieszcańska M, Mazur G. The Assessment  
369 of Fear of COVID-19 among the Elderly Population: A Cross-Sectional Study. Journal of  
370 Clinical Medicine. 2021;10(23):5537. doi: 10.3390/jcm10235537
- 371 10. Wieteska-Milek M, Szmit S, Florczyk M, Kuśmierczyk-Droszcz B, Ryczek R, Dzienisiewicz  
372 M, et al. Fear of COVID-19, Anxiety and Depression in Patients with Pulmonary Arterial  
373 Hypertension and Chronic Thromboembolic Pulmonary Hypertension during the Pandemic.  
374 Journal of Clinical Medicine. 2021;10(18):4195. doi: 10.3390/jcm10184195
- 375 11. Yang Q, Kanjanarat P, Wongpakaran T, Ruengorn C, Awiphan R, Nochaiwong S, et al. Fear  
376 of COVID-19 and Perceived Stress: The Mediating Roles of Neuroticism and Perceived Social  
377 Support. Healthcare. 2022;10(5):812. doi: 10.3390/healthcare10050812
- 378 12. Hernández-Yépez PJ, Muñoz-Pino CO, Ayala-Laurel V, Contreras-Carmona PJ, Inga-  
379 Berrospi F, Vera-Ponce VJ, et al. Factors Associated with Anxiety, Depression, and Stress in  
380 Peruvian University Students during the COVID-19 Pandemic. Int J Environ Res Public  
381 Health. 2022;19(21):14591. doi: 10.3390/ijerph192114591

- 382 13. Aveiro-Róbaldo TR, Garlisi-Torales LD, Chumán-Sánchez M, Pereira-Victorio CJ, Huaman-  
383 Garcia M, Failoc-Rojas VE, et al. Prevalence and Associated Factors of Depression, Anxiety,  
384 and Stress in University Students in Paraguay during the COVID-19 Pandemic. *Int J Environ*  
385 *Res Public Health*. 2022;19(19):12930. doi: 10.3390/ijerph191912930
- 386 14. Santander-Hernández FM, Peralta CI, Guevara-Morales MA, Díaz-Vélez C, Valladares-  
387 Garrido MJ. Smartphone overuse, depression & anxiety in medical students during the  
388 COVID-19 pandemic. *PLoS One*. 2022;17(8):e0273575. doi: 10.1371/journal.pone.0273575
- 389 15. Scoppetta O, Cassiani-Miranda CA, Arismendy-López YA, Tirado-Otálvaro AF.  
390 Psychometric Properties of an Instrument to Assess the Fear of COVID-19 in a Sample in  
391 Argentina: a Mixed Approach. *Int J Ment Health Addict*. 2022;1-14. doi: 10.1007/s11469-  
392 021-00742-5
- 393 16. Nagabhirava G, Godi SM, Goel AD. Fear, Psychological Impact, and Coping During the Initial  
394 Phase of COVID-19 Pandemic Among the General Population in India. *Cureus*.  
395 2021;13(12):e20317. doi: 10.7759/cureus.20317
- 396 17. Valladares-Garrido MJ, Zeña-Ñañez S, Peralta CI, Puicón-Suárez JB, Díaz-Vélez C, Failoc-  
397 Rojas VE. COVID-19 Vaccine Effectiveness at a Referral Hospital in Northern Peru: A  
398 Retrospective Cohort Study. *Vaccines*. 2022;10(5):812. doi: 10.3390/vaccines10050812
- 399 18. Díaz-Vélez C, Failoc-Rojas VE, Valladares-Garrido MJ, Colchado J, Carrera-Acosta L,  
400 Becerra M, et al. SARS-CoV-2 seroprevalence study in Lambayeque, Peru. June–July 2020.  
401 *PeerJ*. 2021;9:e11210. doi: 10.7717/peerj.11210

- 402 19. Vera-Ponce VJ, Mendez-Aguilar P, Ichiro-Peralta C, Failoc-Rojas VE, Valladares-Garrido  
403 MJ. Factors associated with seropositivity for SARS-CoV-2 in patients treated at a hospital in  
404 the Peruvian highlands. *Revista del Cuerpo Medico Hospital Nacional Almanzor Aguinaga*  
405 *Asenjo*. 2021;14:8-12. doi: 10.35434/rcmhnaaa.2021.14Sup1.1140
- 406 20. Moussa ML, Moussa FL, Alharbi HA, Omer T, Sofiany HA, Almuzaini TM, et al. Association  
407 of Fear of COVID-19 and Health Literacy Among the General Public in Saudi Arabia: A  
408 Cross-Sectional Assessment. *Front Public Health*. 2021;9:740625. doi:  
409 10.3389/fpubh.2021.740625
- 410 21. Cerda AA, García LY. Factors explaining the fear of being infected with COVID-19. *Health*  
411 *Expect*. 2021. doi: 10.1111/hex.13274
- 412 22. Modena CF, Kogien M, Marcon SR, Demenech LM, Nascimento FCDS, Carrijo MVN.  
413 Factors associated with the perception of fear of COVID-19 in university students. *Rev Bras*  
414 *Enferm*. 2021;75Suppl 1(Suppl 1):e20210448. doi: 10.1590/0034-7167-2021-0448
- 415 23. Ali M, Uddin Z, Banik PC, Hegazy FA, Zaman S, Ambia ASM, et al. Knowledge, Attitude,  
416 Practice, and Fear of COVID-19: an Online-Based Cross-cultural Study. *Int J Ment Health*  
417 *Addict*. 2021;1-16. doi: 10.1007/s11469-021-00638-4
- 418 24. Caycho-Rodríguez T, Carbajal-León C, Vilca LW, Heredia-Mongrut J, Gallegos M, Caycho-  
419 Rodríguez T, et al. COVID-19 y salud mental en policías peruanos: resultados preliminares.  
420 *Acta Médica Peruana*. 2020;37(3):396-8. doi: 10.35663/amp.2020.373.1503
- 421 25. Caycho-Rodríguez T, Tomás JM, Vilca LW, Carbajal-León C, Cervigni M, Gallegos M, et al.  
422 Socio-Demographic Variables, Fear of COVID-19, Anxiety, and Depression: Prevalence,

- 423 Relationships and Explanatory Model in the General Population of Seven Latin American  
424 Countries. *Front Psychol.* 2021;12:695989. doi: 10.3389/fpsyg.2021.695989
- 425 26. Yılmaz Y, Erdoğan A, Bahadır E. Fear, Anxiety, Burnout, and Insomnia Levels of Healthcare  
426 Workers during COVID-19 Pandemic in Turkey. *Psychiatr Danub.* 2021;33(Suppl 13):350-6.
- 427 27. Iacobucci G. Covid-19: Military drafted in to tackle staffing crisis in London hospitals. *BMJ.*  
428 2022;376:o47. doi: 10.1136/bmj.o47
- 429 28. Lázaro-Pérez C, Martínez-López JÁ, Gómez-Galán J, Fernández-Martínez MDM. COVID-19  
430 Pandemic and Death Anxiety in Security Forces in Spain. *Int J Environ Res Public Health.*  
431 2020;17(21):E7760. doi: 10.3390/ijerph17217760
- 432 29. Rimmer A. Covid-19: Offer staff military-style mental health support, say healthcare leaders.  
433 *BMJ.* 2021;373:n1292. doi: 10.1136/bmj.n1292
- 434 30. Niño M, Harris C, Drawve G, Fitzpatrick KM. Race and ethnicity, gender, and age on  
435 perceived threats and fear of COVID-19: Evidence from two national data sources. *SSM Popul*  
436 *Health.* 2021;13:100717. doi: 10.1016/j.ssmph.2020.100717
- 437 31. Mamun MA. Exploring factors in fear of COVID-19 and its GIS-based nationwide  
438 distribution: the case of Bangladesh. *BJPsych Open.* 2021;7(5):e150. doi:  
439 10.1192/bjo.2021.984
- 440 32. Li YP, Lin CY, Kuo YJ, Chen YP, Griffiths MD. Gender Differences in the Factors Associated  
441 With the Fear of COVID-19 Among Taiwanese Older People. *Inquiry.*  
442 2021;58:469580211055587. doi: 10.1177/00469580211055587

- 443 33. Mertens G, Gerritsen L, Duijndam S, Salemink E, Engelhard IM. Fear of the coronavirus  
444 (COVID-19): Predictors in an online study conducted in March 2020. *J Anxiety Disord.*  
445 2020;74:102258. doi: 10.1016/j.janxdis.2020.102258
- 446 34. Nikopoulou VA, Holeva V, Parlapani E, Karamouzi P, Voitsidis P, Porfyri GN, et al. Mental  
447 Health Screening for COVID-19: a Proposed Cutoff Score for the Greek Version of the Fear  
448 of COVID-19 Scale (FCV-19S). *Int J Ment Health Addiction.* 2020. doi: 10.1007/s11469-020-  
449 00414-w
- 450 35. Ahorsu DK, Lin CY, Imani V, Saffari M, Griffiths MD, Pakpour AH. The Fear of COVID-19  
451 Scale: Development and Initial Validation. *Int J Ment Health Addiction.* 2020. doi:  
452 10.1007/s11469-020-00270-8
- 453 36. Huarcaya-Victoria J, Villarreal-Zegarra D, Podestà A, Luna-Cuadros MA. Psychometric  
454 Properties of a Spanish Version of the Fear of COVID-19 Scale in General Population of Lima,  
455 Peru. *Int J Ment Health Addiction.* 2020. doi: 10.1007/s11469-020-00354-5
- 456 37. Hamedi-Shahraki S, Mir F, Amirkhizi F. Food Insecurity and Cardiovascular Risk Factors  
457 among Iranian Women. *Ecology of Food and Nutrition.* 2021;60(2):163-81. doi:  
458 10.1080/03670244.2020.1812596
- 459 38. Vargas Puello V, Alvarado Orellana S, Atalah Samur E. Inseguridad alimentaria en adultos  
460 mayores en 15 comunas del Gran Santiago: un tema pendiente. *Nutrición Hospitalaria.*  
461 2013;28(5):1430-7. doi: 10.3305/nh.2013.28.5.6663

- 462 39. Craig CL, Marshall AL, Sjöström M, Bauman AE, Booth ML, Ainsworth BE, et al.  
463 International physical activity questionnaire: 12-country reliability and validity. *Med Sci*  
464 *Sports Exerc.* 2003;35(8):1381-95. doi: 10.1249/01.MSS.0000078924.61453.FB
- 465 40. Nicaise V, Crespo NC, Marshall S. Agreement between the IPAQ and accelerometer for  
466 detecting intervention-related changes in physical activity in a sample of Latina women. *J Phys*  
467 *Act Health.* 2014;11(4):846-52. doi: 10.1123/jpah.2011-0412
- 468 41. Salvo D, Reis RS, Sarmiento OL, Pratt M. Overcoming the challenges of conducting physical  
469 activity and built environment research in Latin America: IPEN Latin America. *Prev Med.*  
470 2014;69 Suppl 1:S86-92. doi: 10.1016/j.ypmed.2014.10.014
- 471 42. Rodríguez-Muñoz S, Corella C, Abarca-Sos A, Zaragoza J. Validation of three short physical  
472 activity questionnaires with accelerometers among university students in Spain. *J Sports Med*  
473 *Phys Fitness.* 2017;57(12):1660-8. doi: 10.23736/S0022-4707.17.06665-8
- 474 43. Constán GA, Ricardo Ramírez C, Rodríguez-Gázquez M de los Á, Álvarez Gómez M, Marín  
475 Múnera C, Agudelo Acosta C. Validez y utilidad diagnóstica de la escala EAT-26 para la  
476 evaluación del riesgo de trastornos de la conducta alimentaria en población femenina de  
477 Medellín, Colombia. *Aten Primaria.* 2014;46(6):283-9. doi: 10.1016/j.aprim.2013.11.009
- 478 44. Leiva León NF. La resiliencia como factor asociado al Síndrome de Burnout, depresión y  
479 ansiedad en el personal de salud que labora en las Unidades de Cuidados Intensivos durante la  
480 pandemia COVID-19 en el Perú. 2021.  
481 <https://repositorio.upch.edu.pe/handle/20.500.12866/8964> [Accessed February 23, 2022]



- 482 45. García-León MÁ, González-Gómez A, Robles-Ortega H, Padilla JL, Peralta-Ramírez MI,  
483 García-León MÁ, et al. Propiedades psicométricas de la Escala de Resiliencia de Connor y  
484 Davidson (CD-RISC) en población española. *Anales de Psicología*. 2019;35(1):33-40. doi:  
485 10.6018/analesps.35.1.314111
- 486 46. Caycho-Rodríguez T, Carbajal-León C, Vilca LW, Heredia-Mongrut J, Gallegos M, Caycho-  
487 Rodríguez T, et al. COVID-19 y salud mental en policías peruanos: resultados preliminares.  
488 *Acta Médica Peruana*. 2020;37(3):396-8. doi: 10.35663/amp.2020.373.1503
- 489 47. Lázaro-Pérez C, Martínez-López JÁ, Gómez-Galán J, Fernández-Martínez M del M. COVID-  
490 19 Pandemic and Death Anxiety in Security Forces in Spain. *Int J Environ Res Public Health*.  
491 2020;17(21):7760. doi: 10.3390/ijerph17217760
- 492 48. Satici SA, Kayis AR, Satici B, Griffiths MD, Can G. Resilience, Hope, and Subjective  
493 Happiness Among the Turkish Population: Fear of COVID-19 as a Mediator. *Int J Ment Health*  
494 *Addiction*. 2020. doi: 10.1007/s11469-020-00443-5
- 495 49. Sefidan S, Pramstaller M, La Marca R, Wyss T, Sadeghi-Bahmani D, Annen H, et al.  
496 Resilience as a Protective Factor in Basic Military Training, a Longitudinal Study of the Swiss  
497 Armed Forces. *International Journal of Environmental Research and Public Health*.  
498 2021;18(11):6077. doi: 10.3390/ijerph18116077
- 499 50. MacManus D, Jones N, Wessely S, Fear NT, Jones E, Greenberg N. The mental health of the  
500 UK Armed Forces in the 21st century: resilience in the face of adversity. *BMJ Military Health*.  
501 2014;160(2):125-30. doi: 10.1136/jramc-2013-000213

- 502 51. Wall CL, Lowe M. Facing the fear: resilience and social support in veterans and civilians with  
503 PTSD. *JACPR*. 2020;12(2):75-85. doi: 10.1108/JACPR-11-2019-0455
- 504 52. Niño M, Harris C, Drawve G, Fitzpatrick KM. Race and ethnicity, gender, and age on  
505 perceived threats and fear of COVID-19: Evidence from two national data sources. *SSM -*  
506 *Population Health*. 2021;13:100717. doi: 10.1016/j.ssmph.2020.100717
- 507 53. Mori H, Obinata H, Murakami W, Tatsuya K, Sasaki H, Miyake Y, et al. Comparison of  
508 COVID-19 disease between young and elderly patients: Hidden viral shedding of COVID-19.  
509 *Journal of Infection and Chemotherapy*. 2021;27(1):70-5. doi: 10.1016/j.jiac.2020.09.003
- 510 54. Dai SP, Zhao X, Wu J hui. Effects of Comorbidities on the Elderly Patients with COVID-19:  
511 Clinical Characteristics of Elderly Patients Infected with COVID-19 from Sichuan, China. *J*  
512 *Nutr Health Aging*. 2021;25(1):18-24. doi: 10.1007/s12603-020-1486-1
- 513 55. Liu K, Chen Y, Lin R, Han K. Clinical features of COVID-19 in elderly patients: A comparison  
514 with young and middle-aged patients. *J Infect*. 2020;80(6):e14-8. doi:  
515 10.1016/j.jinf.2020.03.005
- 516 56. Soraci P, Ferrari A, Abbiati FA, Del Fante E, De Pace R, Urso A, et al. Validation and  
517 Psychometric Evaluation of the Italian Version of the Fear of COVID-19 Scale. *Int J Ment*  
518 *Health Addict*. 2020;1-10. doi: 10.1007/s11469-020-00277-1
- 519 57. Mistry SK, Ali ARMM, Akther F, Yadav UN, Harris MF. Exploring fear of COVID-19 and  
520 its correlates among older adults in Bangladesh. *Global Health*. 2021;17(1):47. doi:  
521 10.1186/s12992-021-00698-0

- 522 58. Andrade EF, Pereira LJ, Oliveira APL de, Orlando DR, Alves DAG, Guilarducci J de S, et al.  
523 Perceived fear of COVID-19 infection according to sex, age and occupational risk using the  
524 Brazilian version of the Fear of COVID-19 Scale. *Death Studies*. 2022;46(3):533-42. doi:  
525 10.1080/07481187.2020.1809786
- 526 59. Prazeres F, Passos L, Simões JA, Simões P, Martins C, Teixeira A. COVID-19-Related Fear  
527 and Anxiety: Spiritual-Religious Coping in Healthcare Workers in Portugal. *International*  
528 *Journal of Environmental Research and Public Health*. 2021;18(1):220. doi:  
529 10.3390/ijerph18010220
- 530 60. Asgari Ghoncheh K, Liu CH, Lin CY, Saffari M, Griffiths MD, Pakpour AH. Fear of COVID-  
531 19 and religious coping mediate the associations between religiosity and distress among older  
532 adults. *Health Promot Perspect*. 2021;11(3):316-22. doi: 10.34172/hpp.2021.40
- 533 61. Chen CY, Chen IH, O'Brien KS, Latner JD, Lin CY. Psychological distress and internet-  
534 related behaviors between schoolchildren with and without overweight during the COVID-19  
535 outbreak. *Int J Obes*. 2021;45(3):677-86. doi: 10.1038/s41366-021-00741-5
- 536 62. Magdy Beshbishy A, Hetta HF, Hussein DE, Saati AA, C. Uba C, Rivero-Perez N, et al.  
537 Factors Associated with Increased Morbidity and Mortality of Obese and Overweight COVID-  
538 19 Patients. *Biology*. 2020;9(9):280. doi: 10.3390/biology9090280
- 539 63. Wang J, Zhu L, Liu L, Zhao X, Zhang Z, Xue L, et al. Overweight and Obesity are Risk Factors  
540 of Severe Illness in Patients with COVID-19. *Obesity*. 2020;28(11):2049-55. doi:  
541 10.1002/oby.22979

- 542 64. Hamer M, Gale CR, Kivimäki M, Batty GD. Overweight, obesity, and risk of hospitalization  
543 for COVID-19: A community-based cohort study of adults in the United Kingdom. PNAS.  
544 2020;117(35):21011-3. doi: 10.1073/pnas.2011086117
- 545 65. Diaz VA, Mainous AG, Pope C. Cultural conflicts in the weight loss experience of overweight  
546 Latinos. *Int J Obes*. 2007;31(2):328-33. doi: 10.1038/sj.ijo.0803387
- 547 66. Jacoby E, Goldstein J, López A, Núñez E, López T. Social class, family, and life-style factors  
548 associated with overweight and obesity among adults in Peruvian cities. *Preventive Medicine*.  
549 2003;37(5):396-405. doi: 10.1016/S0091-7435(03)00159-2
- 550 67. Leng A, Xu C, Nicholas S, Nicholas J, Wang J. Quality of life in caregivers of a family member  
551 with serious mental illness: Evidence from China. *Archives of Psychiatric Nursing*.  
552 2019;33(1):23-9. doi: 10.1016/j.apnu.2018.08.010
- 553 68. Ebrahim OS, Al-Attar GST, Gabra RH, Osman DMM. Stigma and burden of mental illness  
554 and their correlates among family caregivers of mentally ill patients. *Journal of the Egyptian  
555 Public Health Association*. 2020;95(1):31. doi: 10.1186/s42506-020-00059-6
- 556 69. Eckardt JP. Caregivers of people with severe mental illness in the COVID-19 pandemic. *The  
557 Lancet Psychiatry*. 2020;7(8):e53-e53. doi: 10.1016/S2215-0366(20)30252-2
- 558 70. Bemanian M, Mæland S, Blomhoff R, Rabben ÅK, Arnesen EK, Skogen JC, et al. Emotional  
559 Eating in Relation to Worries and Psychological Distress Amid the COVID-19 Pandemic: A  
560 Population-Based Survey on Adults in Norway. *Int J Environ Res Public Health*.  
561 2021;18(1):130. doi: 10.3390/ijerph18010130

- 562 71. dos Santos Quaresma MV, Marques CG, Magalhães ACO, dos Santos RVT. Emotional eating,  
563 binge eating, physical inactivity, and vespertine chronotype are negative predictors of dietary  
564 practices during COVID-19 social isolation: A cross-sectional study. *Nutrition*.  
565 2021;90:111223. doi: 10.1016/j.nut.2021.111223
- 566 72. Devonport TJ, Nicholls W, Fullerton C. A systematic review of the association between  
567 emotions and eating behaviour in normal and overweight adult populations. *J Health Psychol*.  
568 2019;24(1):3-24. doi: 10.1177/1359105317697813
- 569 73. Evers C, Marijn Stok F, de Ridder DTD. Feeding Your Feelings: Emotion Regulation  
570 Strategies and Emotional Eating. *Pers Soc Psychol Bull*. 2010;36(6):792-804. doi:  
571 10.1177/0146167210371383
- 572 74. Davis C, Ng KC, Oh JY, Baeg A, Rajasegaran K, Chew CSE. Caring for Children and  
573 Adolescents With Eating Disorders in the Current Coronavirus 19 Pandemic: A Singapore  
574 Perspective. *Journal of Adolescent Health*. 2020;67(1):131-4. doi:  
575 10.1016/j.jadohealth.2020.03.037
- 576 75. Ilktac HY, Savci C, Akinci AC. Nutritional Behavior During COVID-19 Pandemic: The Effect  
577 of Fear and Sleep Quality on Emotional Eating. 2021. doi: 10.21203/rs.3.rs-649450/v1
- 578 76. Pak H, Süsen Y, Denizci Nazlıgül M, Griffiths M. The Mediating Effects of Fear of COVID-  
579 19 and Depression on the Association Between Intolerance of Uncertainty and Emotional  
580 Eating During the COVID-19 Pandemic in Turkey. *Int J Ment Health Addict*. 2021;1-15. doi:  
581 10.1007/s11469-021-00489-z
- 582

583

584 **Supporting information**

585

586 **S1 Table.** Table 1. Characteristics of military personnel from Lambayeque, Peru.

587 **S2 Table.** Table 2. Factors associated with fear of COVID-19 in military personnel,

588 bivariate analysis.

589 **S3 Table.** Table 3. Factors associated with fear of COVID-19 in military personnel, simple

590 and multiple regression analysis.

591 **S1 Fig.** Fig 1. Fear of COVID-19 Scale.

592 **S2 Fig.** Fig 2. Forest plot of the factors associated with fear of COVID-19 in military

593 personnel.

594

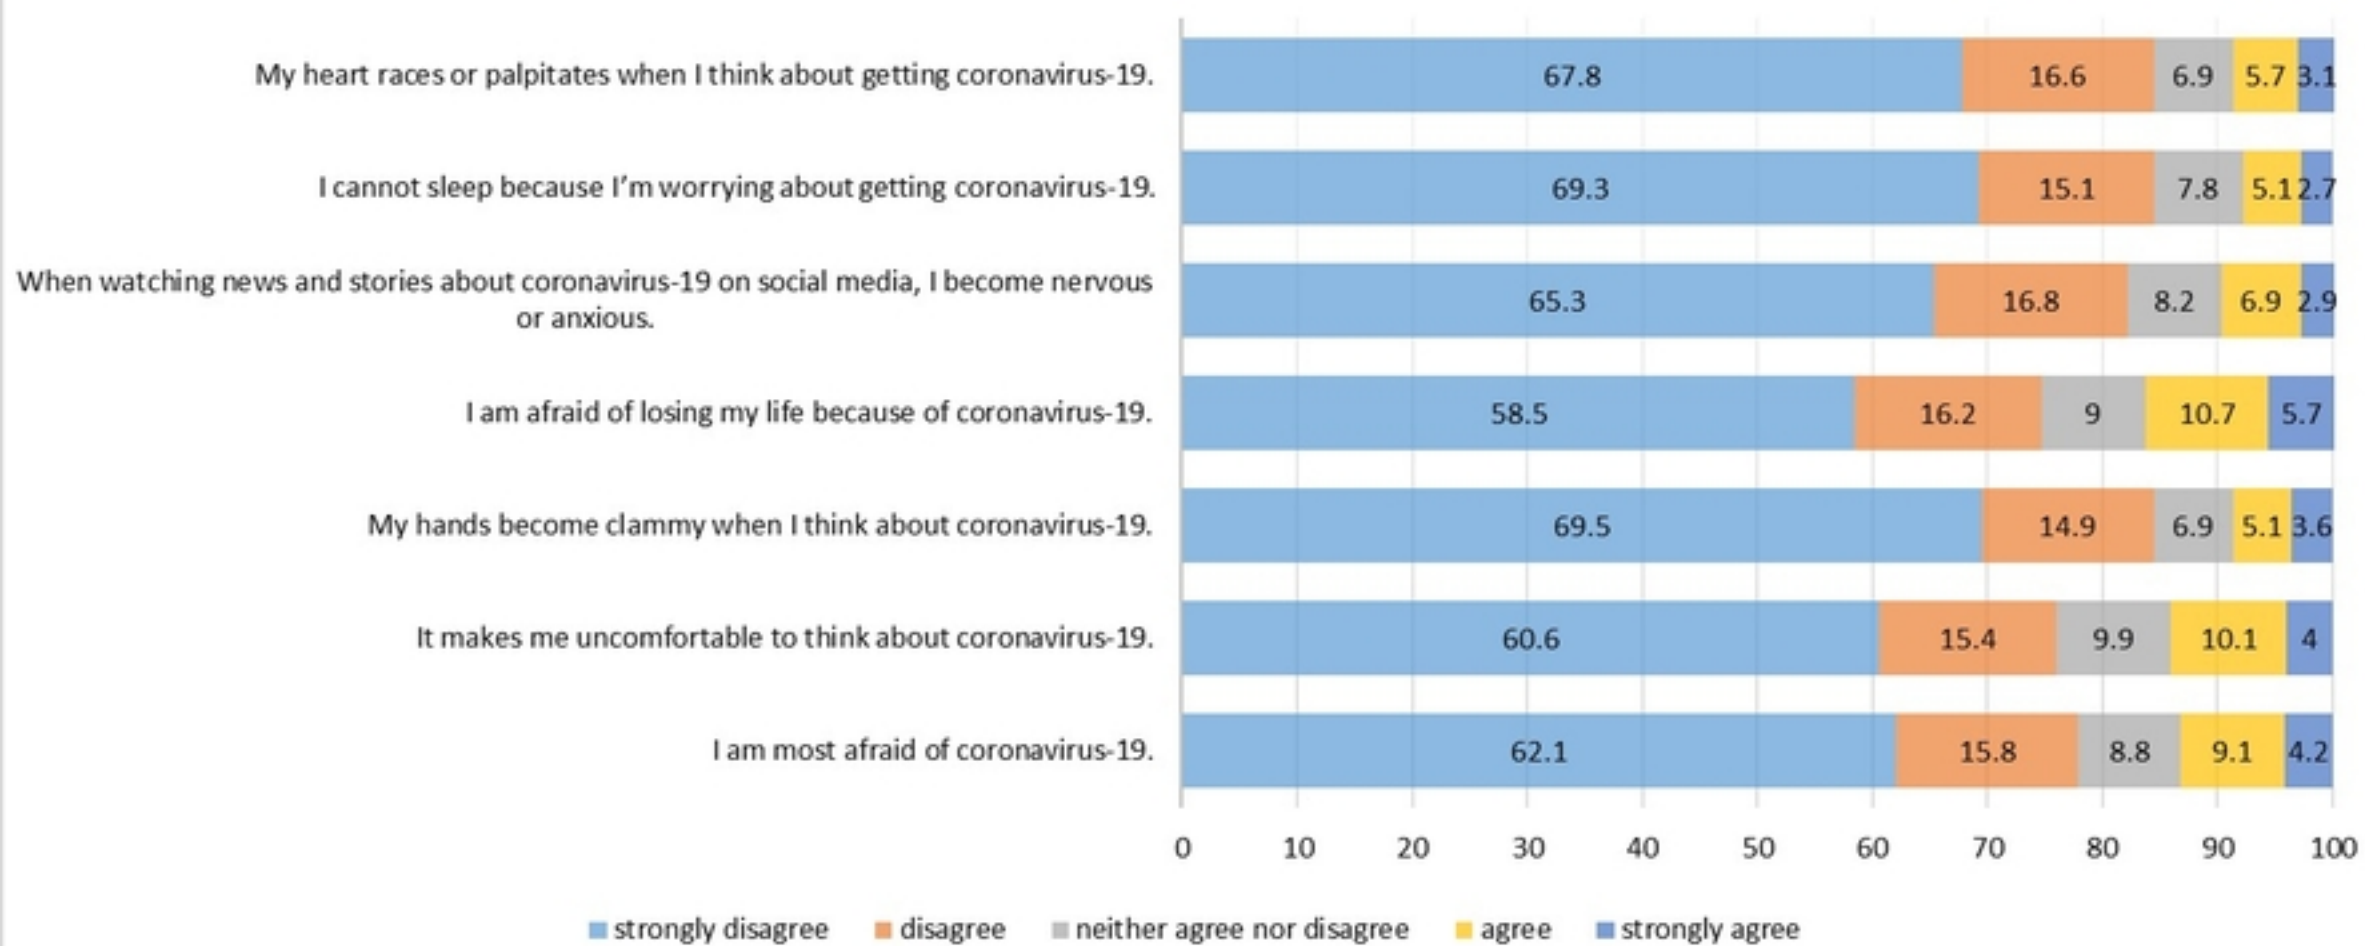

Fig 1. Fear of COVID-19 Scale

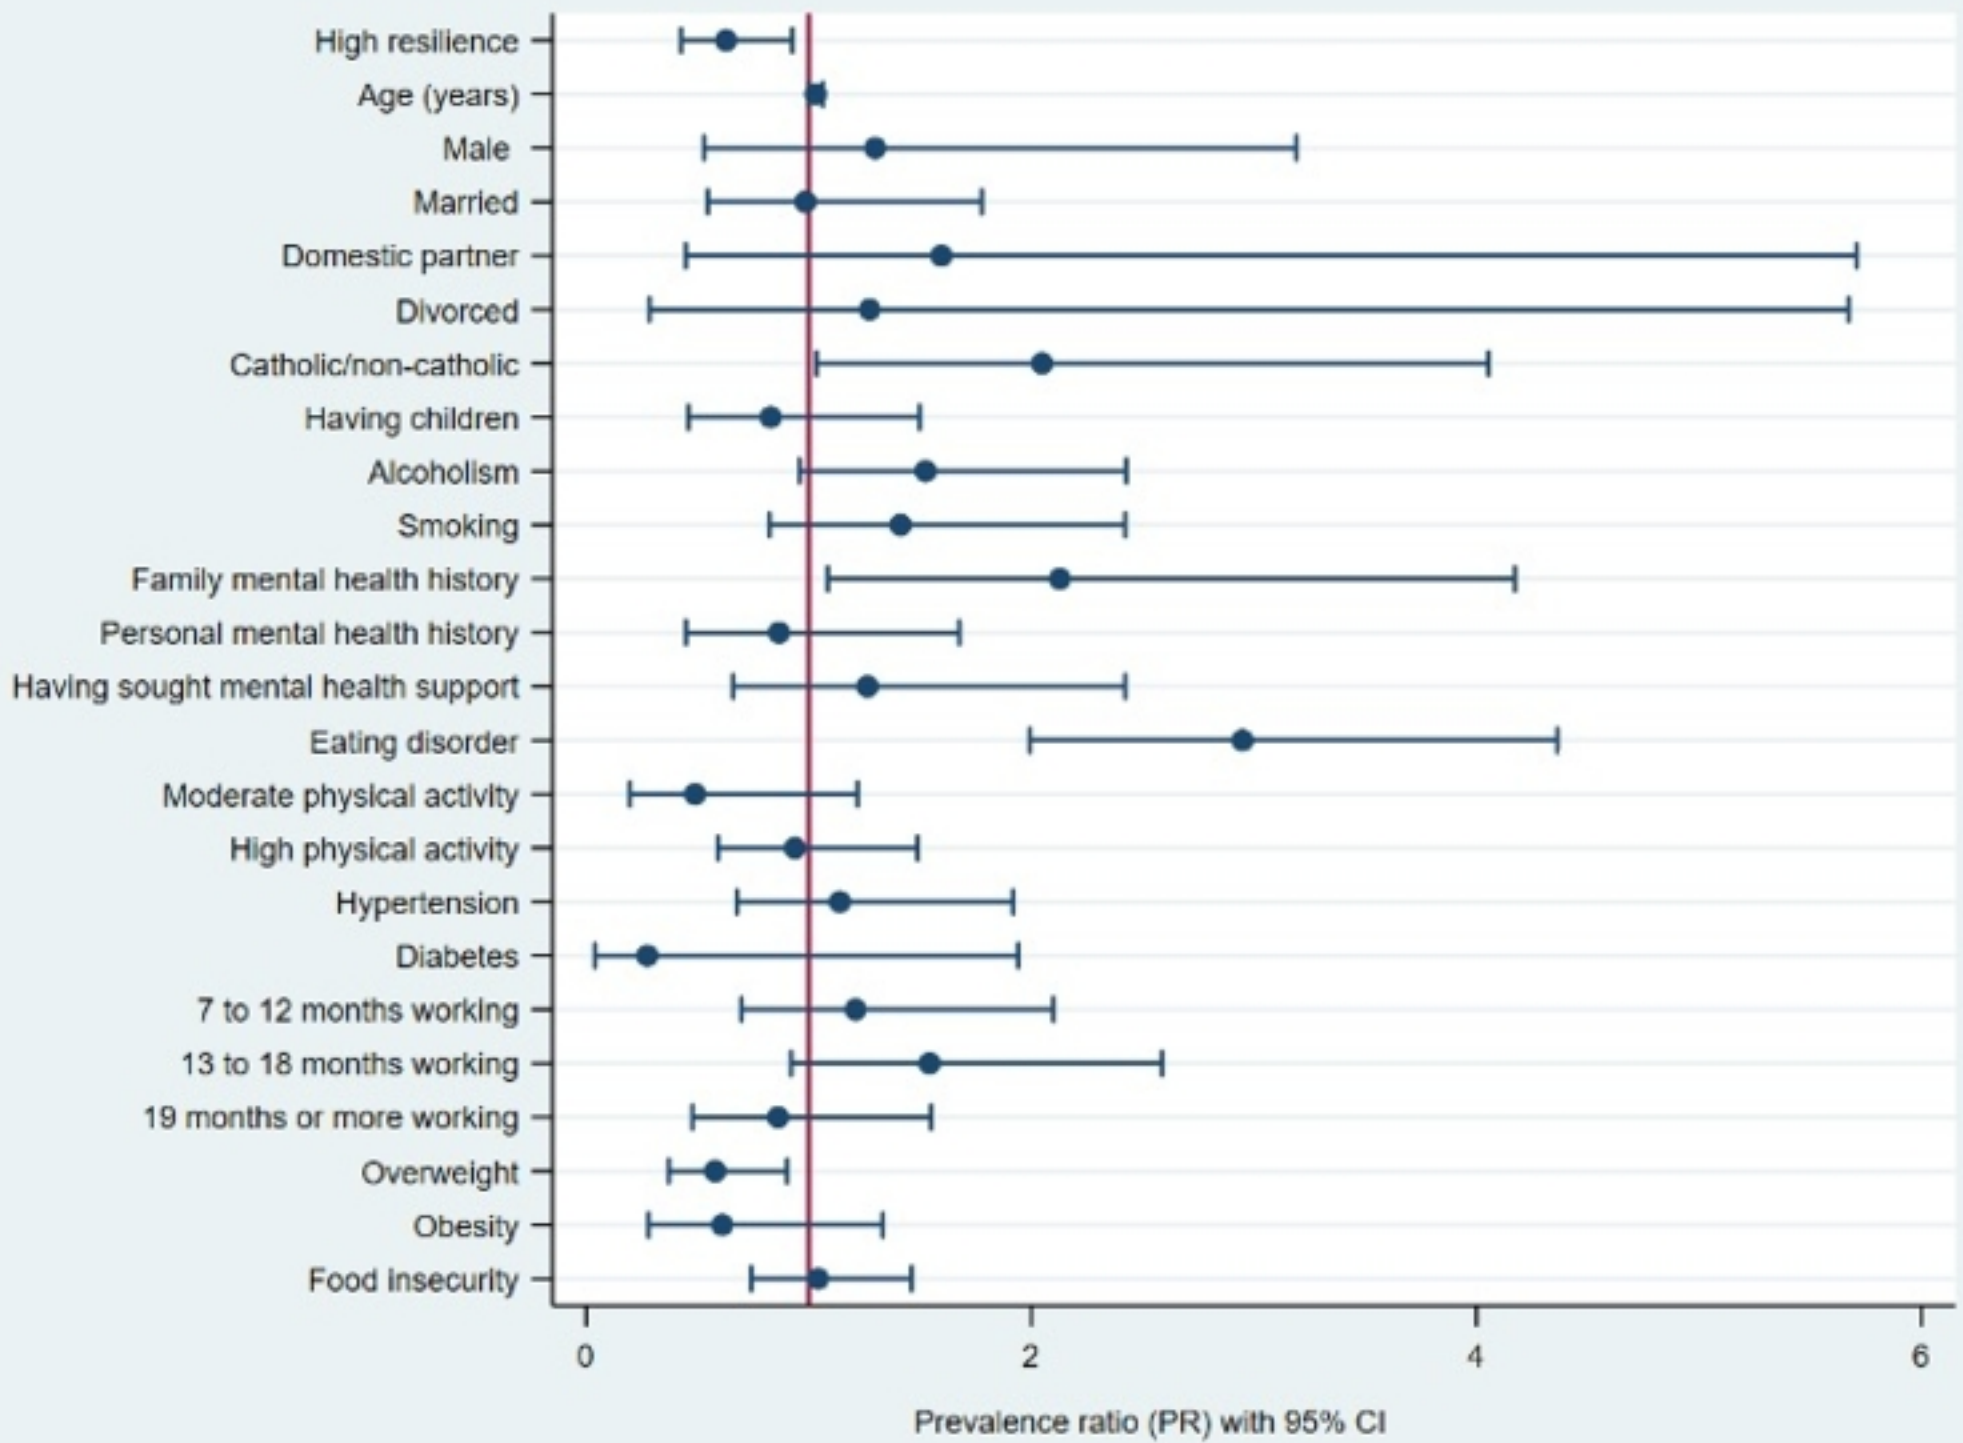

Fig 2. Forest plot of the factors associated with fear of COVID-19
